# Supplementary material for: Discoidin Domain Receptor 2 Mediates Lysophosphatidic Acid-Induced Ovarian Cancer Aggressiveness
Source: MDPI journal article supplement (doi:10.3390/ijms22105374), 2021-05-20
Supplement: s1 [file s1]

# Supplementary Figure S1

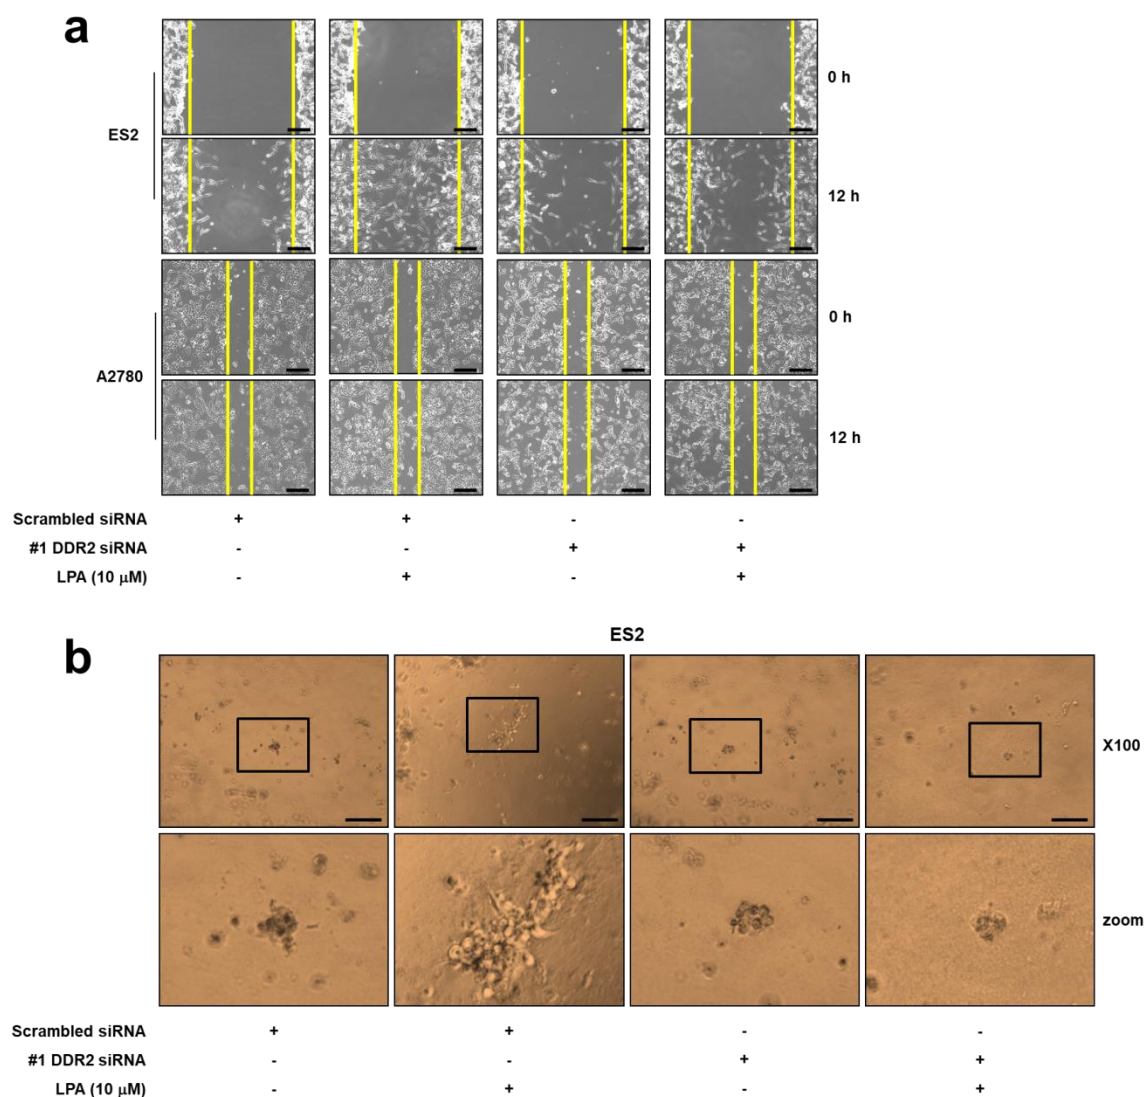

**Figure S1.** The silencing of DDR2 expression inhibits LPA-induced ovarian cancer cell aggressiveness. **(a)** The cells were transfected with indicated siRNAs and then stimulated with LPA (10  $\mu$ M) for wound healing migration assay. Original magnification,  $\times 100$ ; scale bar, 100  $\mu$ m. **(b)** ES2 cells were cultured on 3D Matrigel for 7 days followed by counting branches. Original magnification,  $\times 100$ ; scale bar, 100  $\mu$ m. Results were triplicates from three independent experiments with similar results.
